# Supplementary material for: Nutritional, Fatty Acids, (Poly)phenols and Technological Properties of Flower Powders from Fuchsia hybrida and Alcea rosea
Source: MDPI journal article supplement (doi:10.3390/foods13020237), 2024-01-11
Supplement: s1 [file s1]

# Nutritional, Fatty Acids, (Poly)phenols and Technological Properties of Flower Powders from *Fuchsia hybrida* and *Alcea rosea*

Maritza Castillo-Carrión<sup>1</sup>, Ruth Martínez-Espinosa<sup>1</sup>, José Ángel Pérez-Ángel<sup>2</sup>, Juana Fernández-López<sup>2</sup>, Manuel Viuda-Martos<sup>2</sup>, Raquel Lucas-González<sup>2,3\*</sup>

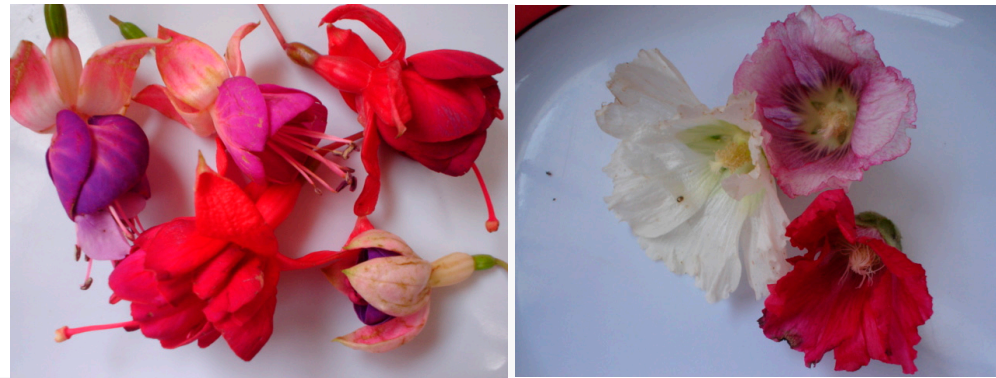

(a) (b)

**Supplementary Figure S1.** Edible flowers studied: (a) Pena pena (*Fuchsia hybrida*), (b) Malvagoma (*Alcea rosea* L)

Supplementary Table S1. Detected (poly)phenols free and bound fractions Pena pena (*Fuchsia hybrida*) and Malvagoma (*Alcea rosea* L) flower powders.

| Nº | rt (min) | Tentative compound                          | UV bands (nm)     | Calibration curve used for quantification  | Fr. | Pena pena<br>( <i>Fuchsia hybrida</i> ) | Fr. | Malvagoma<br>( <i>Alcea rosea</i> L.) |
|----|----------|---------------------------------------------|-------------------|--------------------------------------------|-----|-----------------------------------------|-----|---------------------------------------|
| 1  | 7.4      | Gallic acid*                                | 234 270           | Gallic acid                                | F/B | x                                       | B   | x                                     |
| 2  | 8.2      | Caffeic acid derivative I                   | 242 sh 290 324    | Caffeic acid                               | -   | -                                       | F   | x                                     |
| 3  | 8.6      | Protocatechuic derivative                   | 232 260 292       | Protocatechuic acid                        | -   | -                                       | F   | x                                     |
| 4  | 10.7     | Galocatechin gallate*                       | 236 270           | Galocatechin gallate                       | -   | -                                       | B   | x                                     |
| 5  | 11.3     | Chlorogenic acid derivative                 | 244 sh 298 328    | Chlorogenic acid                           | -   | -                                       | F   | x                                     |
| 6  | 11.6     | Protocatechuic acid*                        | 232 260 292       | Protocatechuic acid                        | -   | -                                       | B   | x                                     |
| 7  | 12.1     | Ellagic acid glycoside I                    | 254 368           | Ellagic acid                               | B   | x                                       | -   | -                                     |
| 9  | 13.9     | Pelargonidin 3-O- $\beta$ -glucopyranoside* | 238 278 sh452 522 | Pelargonidin 3-O- $\beta$ -glucopyranoside | F   | x                                       | F   | x                                     |
| 10 | 14.2     | Malvidin-3,5-O-B-glucopyranoside*           | 276 526           | Malvidin-3,5-O-B-glucopyranoside           | -   | -                                       | F   | x                                     |
| 11 | 15.4     | Cyanydin-3-O- $\beta$ -glucopyranoside*     | 238/280/sh452 520 | Cyanydin-3-O- $\beta$ -glucopyranoside     | F   | x                                       | F   | x                                     |
| 12 | 15.5     | Chlorogenic acid*                           | 244 sh 298 326    | Chlorogenic acid                           | -   | -                                       | F   | x                                     |
| 14 | 15.9     | Peonidin 3-O- $\beta$ -glucopyranoside*     | 276 526           | Peonidin 3-O- $\beta$ -glucopyranoside     | F   | x                                       | -   | -                                     |
| 15 | 15.9     | 4-Hydroxybenzoic acid*                      | 228 256           | 4-Hydroxybenzoic acid                      | -   | -                                       | B   | x                                     |
| 16 | 16.1     | Anthocyanin I                               | 236 276 526       | Malvidin-3,5-O-B-glucopyranoside           | -   | -                                       | F   | x                                     |
| 17 | 16.7     | Delphinidin 3-O- $\beta$ -glucopyranoside*  | 276 502           | Delphinidin 3-O- $\beta$ -glucopyranoside  | F   | x                                       | -   | -                                     |
| 18 | 16.7     | Ellagic acid glycoside II                   | 254 368           | Ellagic acid                               | B   | x                                       | -   | -                                     |
| 19 | 16.8     | Hydrocinnamic acid                          | 244 sh290 330     | phenolic acid                              | -   | -                                       | F   | x                                     |
| 20 | 17.0     | Ellagic acid glycoside III                  | 254 368           | Ellagic acid glycoside                     | B   | x                                       | -   | -                                     |
| 21 | 17.5     | Petunidin 3-O- $\beta$ -glucopyranoside*    | 240 280 sh250 518 | Petunidin 3-O- $\beta$ -glucopyranoside    | F   | x                                       | F   | x                                     |
| 22 | 17.8     | Malvidin 3-O- $\beta$ -glucopyranoside*     | 244 276 sh260 530 | Malvidin 3-O- $\beta$ -glucopyranoside     | F   | x                                       | F   | x                                     |
| 23 | 17.8     | Caffeic acid*                               | 242 sh 290 324    | Caffeic acid                               | B   | x                                       | B   | x                                     |

|    |      |                                    |               |                            |     |   |     |   |
|----|------|------------------------------------|---------------|----------------------------|-----|---|-----|---|
| 24 | 17.9 | Ellagic acid glycoside IV          | 254 368       | Ellagic acid glycoside     | B   | x | -   | - |
| 25 | 18.3 | Quercetin methyl-glycosyde I       | 256 370       | Quercetin methyl-glycosyde | -   | - | F   | x |
| 26 | 18.2 | Ellagic acid glycoside V           | 254 368       | Ellagic acid glycoside     | B   | x | -   | - |
| 27 | 18.3 | Syringic acid*                     | 230 274       | Syringic acid*             | F   | x | B   | x |
| 28 | 18.7 | Ellagic acid glycoside VI          | 254 368       | Ellagic acid glycoside     | B   | x | -   | - |
| 29 | 19.0 | Quercetin methyl-glycosyde II      | 256 370       | Quercetin methyl-glycosyde | -   | - | F   | x |
| 30 | 19.9 | Naringin glycoside I               | 236 290       | Naringin derive            | -   | - | F/B | x |
| 32 | 20.8 | Naringin glycoside II              | 236 290       | Naringin derive            | -   | - | F/B | x |
| 33 | 20.9 | Quercetin glycoside I              | 256 356       | Quercetin                  | F   | x | -   | - |
| 35 | 22.4 | Rutin*                             | 256 356       | Rutin                      | F   | x | F   | x |
| 36 | 22.7 | <i>p</i> -Coumaric acid*           | sh300 310     | <i>p</i> -Coumaric acid    | B   | x | B   | x |
| 37 | 23   | Quercetin glycoside II             | 256 356       | Quercetin                  | F   | x | -   | - |
| 38 | 23.8 | Quercetin glycoside III            | 256 356       | Quercetin                  | F   | x | F/B | x |
| 39 | 23.6 | Ellagic acid*                      | 254 sh304 368 | Ellagic acid               | F/B | x | -   | - |
| 40 | 24.2 | Ferulic acid*                      | 242 sh294 324 | Ferulic acid               | B   | x | B   | x |
| 41 | 24.8 | Apigenin glycoside I               | 268 338       | Apigenin                   | F   | x | -   | - |
| 42 | 24.9 | Anthocyanins II                    | 236 270 530   | Malvidin                   | -   | - | F   | x |
| 43 | 25.3 | Luteolin glycoside I               | 252 266 348   | Luteolin                   | F/B | x | -   | - |
| 44 | 25.2 | Quercetin glycoside IV             | 256 356       | Quercetin                  | -   | - | F   | x |
| 45 | 25.7 | Quercetin glycoside V              | 256 356       | Quercetin                  | F   | x | -   | - |
| 46 | 25.8 | <i>p</i> -Coumaric acid derivative | 300 310       | <i>p</i> -Coumaric acid    | B   | x | -   | - |
| 47 | 26   | Luteolin glycoside II              | 252 266 348   | Luteolin                   | F/B | x | F/B | x |
| 48 | 26.3 | Quercetin glycoside VI             | 256 356       | Quercetin                  | F/B | x | -   | - |
| 49 | 26.4 | Anthocyanins III                   | 236 270 530   | Malvidin                   | -   | - | F   | x |
| 50 | 26.6 | Quercetin glycoside VII            | 256 356       | Quercetin                  | F   | x | -   | - |
| 51 | 26.6 | Kaempferol glycoside I             | 266 366       | Kaempferol                 | B   | x | -   | - |
| 52 | 26.9 | Apigenin glycoside II              | 268 336       | Apigenin                   | -   | - | F   | x |
| 53 | 27.1 | Luteolin glycoside III             | 252 266 348   | Luteolin                   | F   | x | -   | - |

|                                   |      |                            |                |              |     |   |     |   |
|-----------------------------------|------|----------------------------|----------------|--------------|-----|---|-----|---|
| 54                                | 27.4 | Kaempherol glycoside II    | 266 366        | Kaempherol   | -   | - | F/B | x |
| 55                                | 27.8 | Quercetin glycoside VIII   | 256 356        | Quercetin    | -   | - | F   | x |
| 56                                | 28   | Luteolin glycoside IV      | 252 266 348    | Luteolin     | F   | x | -   | - |
| 57                                | 28.2 | Ferulic derivative         | 242 sh294 324  | Ferulic      | -   | - | B   | x |
| 58                                | 28.8 | Luteolin glycoside V       | 252 266 250    | Luteolin     | F/B | x | -   | - |
| 59                                | 29.5 | Kaempherol glycoside III   | 266 366        | Kaempherol   | -   | - | F/B | x |
| 60                                | 31.6 | Caffeic acid derivative II | 242 sh 290 324 | Caffeic acid | -   | - | F   | x |
| 61                                | 33.6 | Quercetin*                 | 256 370        | Quercetin    | F/B | x | -   | - |
| 62                                | 33.9 | Apigenin glycoside III     | 268 338        | Apigenin     | -   | - | F   | x |
| 63                                | 38.4 | Kaempherol*                | 250 266 366    | Kaempherol   | B   | x | F   | x |
| <b>Total bound</b>                |      |                            |                |              | 12  |   | 9   |   |
| <b>Total free</b>                 |      |                            |                |              | 18  |   | 22  |   |
| <b>Total both</b>                 |      |                            |                |              | 7   |   | 6   |   |
| <b>Total quantified compounds</b> |      |                            |                |              | 37  |   | 37  |   |

---

\*Compounds confirmed by standard
